# Supplementary material
Source: publisher site journal article supplement (https://www.dovepress.com/article/153496)
Supplement: Supplementary file 1 [file get_supplementary_file.php]

```

*****;
*****;
* Author          : Melanie Greenland
* Association     : School of Population and Global Health, The University of Western Australia
* Date           : March 2018
* Version        : v1.0
* Paper title    : Operationalization and validation of a novel method to calculate adherence to polypharmacy
                  with refill data from the Australian Benefits Scheme (PBS) database
* Description     : SAS program for calculating DPPR from refill data
*****;
*****;

* need to have variables named the following:
  ID - id of patient
  group - user defined drug group for atc code
  atc_code - specific atc code for the supply
  supply_date - date of supply
  quantity - quantity of medication supplied
  end_date - readmission date (this is the final date used in calculations)
  dose - dose of medication per day
;

* there should be no repeat supply_dates by group, atc_code and ID;
* there should be complete fields for each observation - no missing cells e.g. no missing atc codes;

* import dataset, rename variables and remove labels;
data indatal (drop = adm_date adm_time sep_date sep_time sex age diag1 dod1 ddd units);
  set <<dataset_name>>;
  rename rootnum = ID atc7 = atc_code totqty = quantity eop = end_date drg_grp = group supp_date = supply_date;
  attrib _all_ label = '';
  dose = 1;
  if atc7 = 'C07AG02' or atc7 = 'C07AB02_T' then dose = 2;
run;

* sort data by patient ID, drug group and supply date;
proc sort data = indatal;
  by ID group supply_date;
run;

```

```

* calculate duration of supply in days, create variable with first supply date for each group by group and patient;
data indata2 start_dates1 (keep = ID group start_date);
  set indata1;
  by ID group ;
  format start_date ddmmyy10.;
  retain start_date;
  duration = quantity/dose;
  if first.group = 1 then start_date = supply_date;
  start_date = start_date;
  output indata2;
  if first.group = 1 then output start_dates1;
run;

* sort start_dates dataset by ID and start_date, want to find if patient had staggered start dates;
proc sort data = start_dates1;
  by ID start_date;
run;

* if a patient has staggered start dates then class a new supply start as starting a new period;
* want number of periods by patient and the start date of each new period;
data start_dates2 (drop = prev_start) start_dates3 (keep = ID period rename = (period = total_periods));
  set start_dates1;
  by ID;
  format prev_start ddmmyy10.;
  retain period prev_start;
  if first.id = 1 then do;
    period = 1;
    prev_start = start_date;
  end;
  if prev_start < start_date then period = period + 1;
  prev_start = start_date;
  output start_dates2;
  if last.id = 1 then output start_dates3;
run;

* merge the start date of each period and the total number of periods together by ID;
data start_dates4;
  merge start_dates2 start_dates3;
  by ID;
run;

```

```

* want to calculate a variable called repeats which will indicate how many times to repeat the supply record (proxy
start date to have clean calculations);
* if a patient has staggered supply starts then we need to create proxy supplies (0 quantity) but start date of new
period so need to create repeats now;
data repeats1 repeats2;
  set start_dates4;
  repeats = total_periods - period;
  output repeats1;
  do repeat_i = 1 to repeats;
    output repeats2;
  end;
run;

* set the two datasets together: one with all actual supplies and dataset with proxy supply dates (repeated supplies
with start_date missing);
data repeats3;
  set repeats1 repeats2;
  if repeat_i >=1 then start_date = .;
  if repeat_i >=1 then period = period + repeat_i;
  if repeat_i = . then repeat_i = 0;
  drop repeats;
run;

* sort by patient ID, period and repeat index;
proc sort data = repeats3;
  by ID period repeat_i;
run;

* retain down the supply date of new period for the new proxy repeat supplies;
data repeats4 (drop = start_date repeat_i);
  set repeats3;
  by ID period ;
  format supply_date ddmmyy10.;
  retain supply_date;
  if first.ID = 1 then supply_date = start_date;
  if start_date ne . then supply_date = start_date;
run;

```

```

* read from dataset repeats4, if the ID, group and supply date match to a record in indata2 then keep and output as
match;
* read from dataset repeats4, if the ID, group and supply date do not match to a record in indata2 then keep and output
as indata2_only;
data match indata2_only (drop = total_periods period);
  if 0 then set repeats4;
  if _n_ = 1 then do;
    declare hash a(dataset:'repeats4');
    a.defineKey('ID', 'group', 'supply_date');
    a.defineData(all: 'yes');
    a.defineDone();
  end;
  set indata2;
  if a.find() = 0 then output match;
  if a.find() ne 0 then output indata2_only;
run;

* read from dataset indata2, if the ID, group and supply date do not match to a record in repeats4 then keep and output
as repeats4_only;
data repeats4_only (keep = id group supply_date total_periods period);
  if 0 then set indata2;
  if _n_ = 1 then do;
    declare hash b(dataset: 'indata2');
    b.defineKey('ID', 'group', 'supply_date');
    b.defineData(all: 'yes');
    b.defineDone();
  end;
  set repeats4;
  if b.find() ne 0 then output repeats4_only;
run;

* set all three datasets together with their key (match, original supply or dummy supply);
data all1;
  set match (in = match) indata2_only (in = d2) repeats4_only (in = d7);
  format source $8.;
  if match then source = 'match';
  if d2 then source = 'original';
  if d7 then source = 'dummy';
  if duration = . AND source = 'dummy' then duration = 0;
run;

* sort patient id, supply date, descending period in order to retain dates for next step;
proc sort data = all1;
  by ID supply_date descending period ;
run;

```

```

* retain down period and total_periods for original supplies;
data all2 (drop = total_periods_retain period_retain start_date);
  set all1;
  by ID period notsorted;
  retain total_periods_retain period_retain;
  if first.ID = 1 then do;
    total_periods_retain = .;
    period_retain = .;
  end;
  if total_periods ne . then total_periods_retain = total_periods;
  total_periods = total_periods_retain;
  if period ne . then period_retain = period;
  period = period_retain;
run;

* sort data;
proc sort data = all2;
  by ID group period supply_date atc_code;
run;

* retain down atc_code, quantity, end_date and dose for dummy supplies;
data all3;
  set all2;
  retain _quantity _end_date _dose _atc_code;
  if quantity ne . then _quantity = quantity;
  else quantity = _quantity;
  if end_date ne . then _end_date = end_date;
  else end_date = _end_date;
  if dose ne . then _dose = dose;
  else dose = _dose;
  if atc_code ne '' then _atc_code = atc_code;
  else atc_code = _atc_code;
  drop _quantity _end_date _dose _atc_code;
run;

* create next_supply_date and next_atc_code variables;
data all4;
  recno = _n_ + 1; /* select next observation */
  set all3 end = last; /* last is the end observation in the dataset */
  if last ne 1 then set all3 (keep = supply_date atc_code rename = (supply_date = next_supply_date atc_code =
next_atc_code)) point = recno;
  else do;
    next_supply_date = .; /* set the last observation of the dataset to missing for the two new variables */
    next_atc_code = '';
  end;
run;

```

```
* need to set the last supply date for each group to end_date and set next_atc_code to missing for last group,
* also flag if next supply is different by atc_code as need to discard previous supplies if changing medication ;
```

```
data all5;
  set all4;
  by ID group;
  if last.group = 1 then do;
    next_supply_date = end_date;
    next_atc_code = '';
  end;
  if last.group ne 1 and atc_code ne next_atc_code then next_atc_code_diff = 1;
run;
```

```
* calculate time to next supply in days, difference in days between duration of supply and time to next supply,
* possible oversupply after second supply date, possible number of days not on drugs between two dates;
```

```
data all6;
  set all5;
  by ID group;
  ttns = next_supply_date - supply_date;
  diff_days = ttns - duration;
  if diff_days < 0 then do;
    if atc_code = next_atc_code then poss_ovs = abs(diff_days);
    if atc_code ne next_atc_code then poss_ovs = 0;
  end;
  if diff_days >= 0 then do;
    poss_ovs = 0;
    poss_dnod = diff_days;
  end;
  if diff_days < 0 then poss_dnod = 0;
run;
```

```
* calculate actual oversupply, retain down for future 'gaps' to calculate actual days not on drug ;
```

```
data all7;
  set all6;
  by ID group;
  retain act_ovs 0;
  if first.group = 1 then act_ovs = 0;
  act_ovs = act_ovs + poss_ovs - poss_dnod;
  if act_ovs <= 0 then act_dnod = abs(act_ovs); /* set act_dnod to number of days without supply */
  if act_ovs > 0 then act_dnod = 0; /* set act_dnod to 0 if there is oversupply */
  if act_ovs <= 0 then act_ovs = 0; /* finally set act_ovs to 0 if less than 0 */
run;
```

```

* now we're only really interested in days not on drugs to calculate dppr;
* calculate cumulative number of days in period by ID, group and period (sum together time to next supply by period);
* calculate cumulative number of days in period not on drug by ID, group and period (sum together act_dnod by period);
data all8;
  set all7;
  by ID group period;
  retain period_group_dnod period_days;
  if first.period = 1 then do;
    period_group_dnod = 0;
    period_days = 0;
  end;
  period_group_dnod = period_group_dnod + act_dnod;
  period_days = period_days + ttns;
run;

* keep the last observation with cumulative sums on for calculations by ID, group and period;
data periods1 (keep = ID total_periods group period period_group_dnod period_days);
  set all8;
  by ID group period;
  if last.period = 1;
run;

proc sort data = periods1;
  by ID period group;
run;

* calculate cumulative days not on drug by period, number of groups in period, dppr numerator by period, dppr
denominator by period;
data periods2 (keep = ID period total_periods no_groups period_num period_den);
  set periods1;
  by ID period;
  retain period_dnod no_groups;
  if first.period = 1 then do;
    period_dnod = 0;
    no_groups = 0;
  end;
  period_dnod = period_dnod + period_group_dnod;
  no_groups = no_groups + 1;
  if last.period = 1 then do;
    period_num = period_days - period_dnod/no_groups;
    period_den = period_days;
  end;
  if last.period = 1;
run;

```

```
* calculate dppr by ID;
data dppr (keep = ID total_periods no_groups DPPR);
  set periods2;
  by ID;
  format dppr 8.2;
  retain num den ;
  if first.ID = 1 then do;
    num = 0;
    den = 0;
  end;
  num = num + period_num;
  den = den + period_den;
  if last.ID = 1 then dppr = (num/den)*100;
  if last.ID = 1;
run;

* keep only dppr dataset;
proc datasets lib = work nolist;
  save dppr ;
quit;
```
